# Supplementary figures and images for: Effect of Intermittent vs. Continuous Energy Restriction on Visceral Fat: Protocol for The Healthy Diet and Lifestyle Study 2 (HDLS2)
Source: MDPI journal article supplement (doi:10.3390/nu16101478), 2024-05-14

## Schema – The Healthy Diet & Lifestyle 2 Protocol (HDLS2)

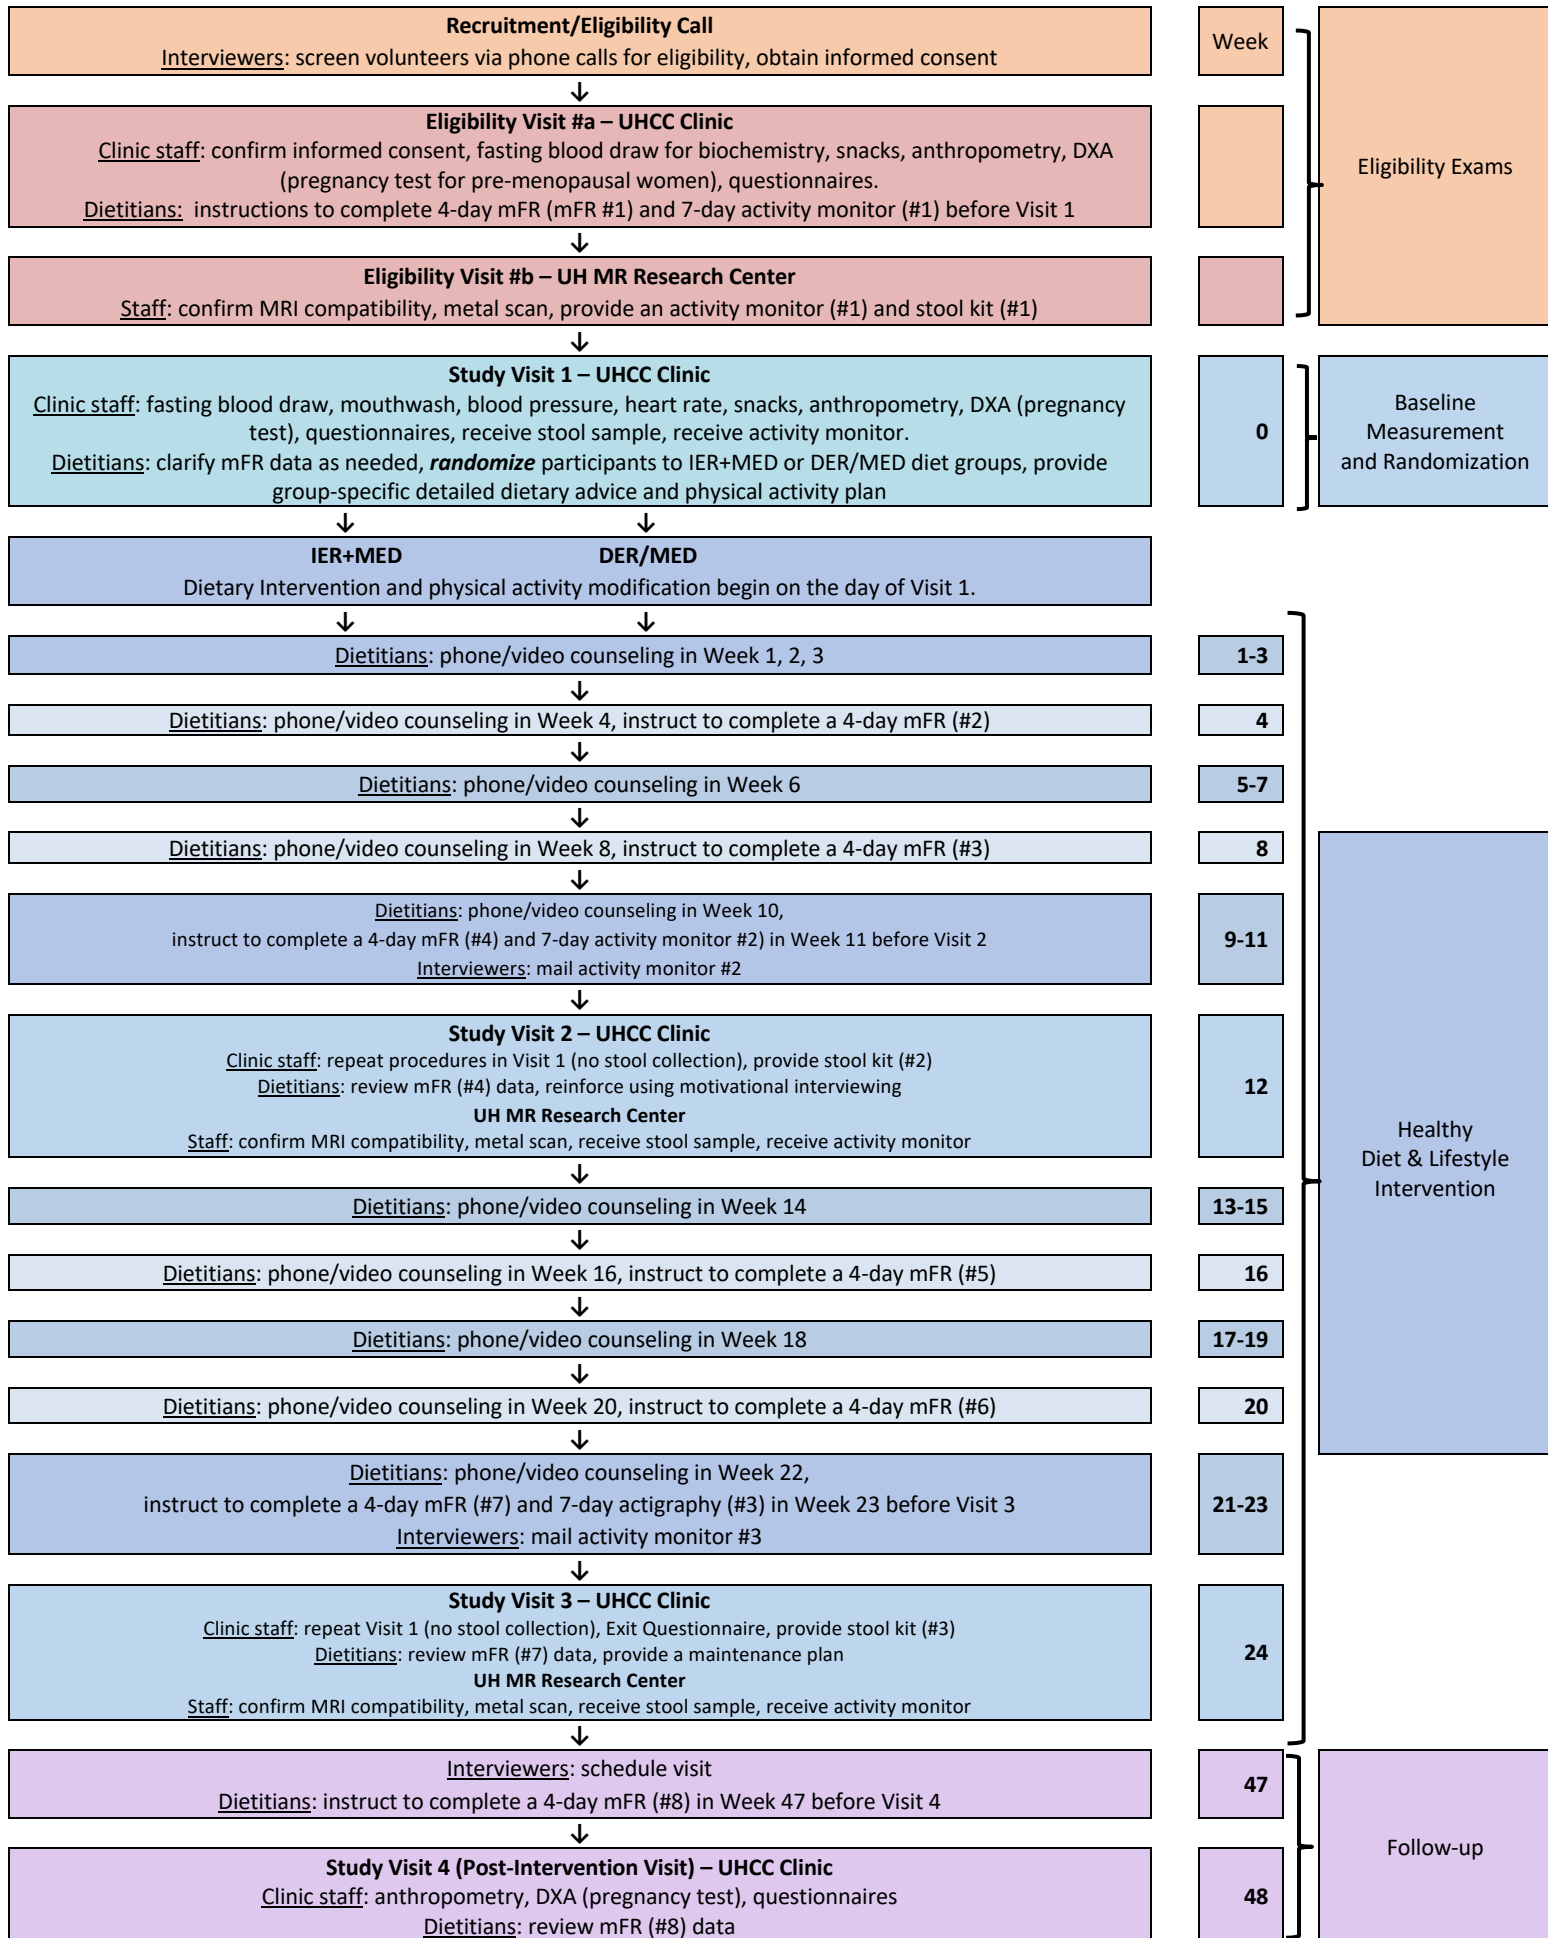

Supplement: s1 [file s1]
